# Supplementary material
Source: publisher figshare collection journal article supplement (https://tandf.figshare.com/articles/dataset/_/7093472)
Supplement: Supplementary file 1 [file 1]

**Supplementary Table S1. The list of the total 408 DEGs in blood from mice between WT infection group and *Ant* infection group.**

| Symbol   | GeneID                          | log <sub>2</sub> Ratio<br>( <i>Ant</i> /WT) | Probability | Description                                                               | Gene express<br>pattern in <i>Ant</i> |
|----------|---------------------------------|---------------------------------------------|-------------|---------------------------------------------------------------------------|---------------------------------------|
| Snord35b | 27212                           | 9.86                                        | 0.92        | small nucleolar RNA, C/D box 35B                                          | UP                                    |
| Mir19a   | 723891                          | 8.57                                        | 0.83        | microRNA 19a                                                              | UP                                    |
| Fcer2a   | 14128                           | 5.47                                        | 0.96        | Fc receptor, IgE, low affinity II, alpha polypeptide                      | UP                                    |
| Ace      | 11421                           | 5.22                                        | 0.95        | angiotensin I converting enzyme (peptidyl-dipeptidase A) 1                | UP                                    |
| Sycp2    | 320558                          | 4.69                                        | 0.83        | synaptonemal complex protein 2                                            | UP                                    |
| -        | gi 87299631 ref NM_009987.3     | 4.03                                        | 0.86        | Mus musculus chemokine (C-X3-C) receptor 1 (Cx3cr1), mRNA                 | UP                                    |
| Cr2      | 12902                           | 3.87                                        | 0.85        | complement receptor 2                                                     | UP                                    |
| Rufy4    | 435626                          | 3.80                                        | 0.84        | RUN and FYVE domain containing 4                                          | UP                                    |
| Clec7a   | 56644                           | 3.40                                        | 0.89        | C-type lectin domain family 7, member a                                   | UP                                    |
| Ccr6     | 12458                           | 3.34                                        | 0.83        | chemokine (C-C motif) receptor 6                                          | UP                                    |
| Snord89  | 100217461                       | 2.90                                        | 0.82        | small nucleolar RNA, C/D box 89                                           | UP                                    |
| Mcam     | 84004                           | 2.86                                        | 0.80        | melanoma cell adhesion molecule                                           | UP                                    |
| Prr5l    | 72446                           | 2.68                                        | 0.83        | proline rich 5 like                                                       | UP                                    |
| H2-Ob    | 15002                           | 2.61                                        | 0.85        | histocompatibility 2, O region beta locus                                 | UP                                    |
| S1pr5    | 94226                           | 2.48                                        | 0.80        | sphingosine-1-phosphate receptor 5                                        | UP                                    |
| Gm4055   | 100042834                       | 2.45                                        | 0.85        | predicted gene 4055                                                       | UP                                    |
| Nlrp12   | 378425                          | 2.36                                        | 0.83        | NLR family, pyrin domain containing 12                                    | UP                                    |
| Cyp4f18  | 72054                           | 2.33                                        | 0.85        | cytochrome P450, family 4, subfamily f, polypeptide 18                    | UP                                    |
| Tppp3    | 67971                           | 2.32                                        | 0.83        | tubulin polymerization-promoting protein family member 3                  | UP                                    |
| Cd5      | 12507                           | 2.27                                        | 0.80        | CD5 antigen                                                               | UP                                    |
| Emr4     | 52614                           | 2.09                                        | 0.83        | EGF-like module containing, mucin-like, hormone receptor-like sequence 4  | UP                                    |
| Rgs2     | 19735                           | 2.06                                        | 0.84        | regulator of G-protein signaling 2                                        | UP                                    |
| Il1b     | 16176                           | 1.97                                        | 0.86        | interleukin 1 beta                                                        | UP                                    |
| -        | gi 147905968 ref NM_001085501.1 | 1.95                                        | 0.83        | Mus musculus protein phosphatase 1, regulatory subunit 3D (Ppp1r3d), mRNA | UP                                    |
| Kcna3    | 16491                           | 1.94                                        | 0.82        | potassium voltage-gated channel, shaker-related subfamily, member 3       | UP                                    |
| Bcl11a   | 14025                           | 1.92                                        | 0.80        | B cell CLL/lymphoma 11A (zinc finger protein)                             | UP                                    |
| Pdgfa    | 18590                           | 1.91                                        | 0.83        | platelet derived growth factor, alpha                                     | UP                                    |
| Cd300lb  | 217304                          | 1.90                                        | 0.83        | CD300 antigen like family member B                                        | UP                                    |
| H2-Oa    | 15001                           | 1.90                                        | 0.81        | histocompatibility 2, O region alpha locus                                | UP                                    |
| Ear2     | 13587                           | 1.89                                        | 0.83        | eosinophil-associated, ribonuclease A family, member 2                    | UP                                    |
| Mtus1    | 102103                          | 1.89                                        | 0.84        | mitochondrial tumor suppressor 1                                          | UP                                    |
| Adam19   | 11492                           | 1.88                                        | 0.84        | a disintegrin and metallopeptidase domain 19 (meltrin beta)               | UP                                    |
| Cd300ld  | 217305                          | 1.87                                        | 0.82        | CD300 molecule-like family member d                                       | UP                                    |
| Steap4   | 117167                          | 1.84                                        | 0.85        | STEAP family member 4                                                     | UP                                    |
| Bank1    | 242248                          | 1.84                                        | 0.83        | B cell scaffold protein with ankyrin repeats 1                            | UP                                    |
| Sfxn5    | 94282                           | 1.78                                        | 0.82        | sideroflexin 5                                                            | UP                                    |
| Cd3g     | 12502                           | 1.73                                        | 0.81        | CD3 antigen, gamma polypeptide                                            | UP                                    |
| Slc40a1  | 53945                           | 1.72                                        | 0.83        | solute carrier family 40 (iron-regulated transporter), member 1           | UP                                    |
| Ralgps2  | 78255                           | 1.72                                        | 0.81        | Ral GEF with PH domain and SH3 binding motif 2                            | UP                                    |
| Ifitm1   | 68713                           | 1.72                                        | 0.85        | interferon induced transmembrane protein 1                                | UP                                    |

|               |                                      |      |      |                                                                             |    |
|---------------|--------------------------------------|------|------|-----------------------------------------------------------------------------|----|
| LOC100862462  | 100862462                            | 1.71 | 0.80 | uncharacterized LOC100862462                                                | UP |
| Myadm         | 50918                                | 1.69 | 0.85 | myeloid-associated differentiation marker                                   | UP |
| Pcp4l1        | 66425                                | 1.68 | 0.85 | Purkinje cell protein 4-like 1                                              | UP |
| Mgam          | 232714                               | 1.67 | 0.82 | maltase-glucoamylase                                                        | UP |
| St8sia4       | 20452                                | 1.66 | 0.80 | ST8 alpha-N-acetyl-neuraminide alpha-2,8-sialyltransferase 4                | UP |
| Csf3r         | 12986                                | 1.66 | 0.85 | colony stimulating factor 3 receptor (granulocyte)                          | UP |
| Tspan13       | 66109                                | 1.64 | 0.82 | tetraspanin 13                                                              | UP |
| Tnik          | 665113                               | 1.61 | 0.81 | TRAF2 and NCK interacting kinase                                            | UP |
| Ggt1          | 14598                                | 1.60 | 0.81 | gamma-glutamyltransferase 1                                                 | UP |
| Pls1          | 102502                               | 1.59 | 0.81 | plastin 1 (I-isoform)                                                       | UP |
| Il13ra1       | 16164                                | 1.58 | 0.83 | interleukin 13 receptor, alpha 1                                            | UP |
| H2-DMb2       | 15000                                | 1.53 | 0.82 | histocompatibility 2, class II, locus Mb2                                   | UP |
| Cd19          | 12478                                | 1.53 | 0.83 | CD19 antigen                                                                | UP |
| Cxcr5         | 12145                                | 1.52 | 0.81 | chemokine (C-X-C motif) receptor 5                                          | UP |
| Cd55          | 13136                                | 1.52 | 0.81 | CD55 antigen                                                                | UP |
| Ccp1          | 72278                                | 1.51 | 0.83 | cell cycle progression 1                                                    | UP |
| Rgs3          | 50780                                | 1.49 | 0.80 | regulator of G-protein signaling 3                                          | UP |
| Pax5          | 18507                                | 1.46 | 0.82 | paired box gene 5                                                           | UP |
| Scd1          | 20249                                | 1.45 | 0.81 | stearoyl-Coenzyme A desaturase 1                                            | UP |
| Ikzf3         | 22780                                | 1.45 | 0.82 | IKAROS family zinc finger 3                                                 | UP |
| Gmpr          | 66355                                | 1.44 | 0.81 | guanosine monophosphate reductase                                           | UP |
| Faim3         | 69169                                | 1.42 | 0.82 | Fas apoptotic inhibitory molecule 3                                         | UP |
| Ltb           | 16994                                | 1.41 | 0.83 | lymphotoxin B                                                               | UP |
| Chst3         | 53374                                | 1.40 | 0.81 | carbohydrate (chondroitin 6/keratan) sulfotransferase 3                     | UP |
| Rnase6        | 78416                                | 1.40 | 0.81 | ribonuclease, RNase A family, 6                                             | UP |
| -             | gi 124430499 ref<br>[NM_001080971.1] | 1.39 | 0.83 | Mus musculus tubulin, beta 1 class VI (Tubb1), mRNA                         | UP |
| Pi16          | 74116                                | 1.39 | 0.81 | peptidase inhibitor 16                                                      | UP |
| Cxcr2         | 12765                                | 1.38 | 0.83 | chemokine (C-X-C motif) receptor 2                                          | UP |
| Itgb7         | 16421                                | 1.37 | 0.81 | integrin beta 7                                                             | UP |
| Map4k2        | 26412                                | 1.36 | 0.81 | mitogen-activated protein kinase kinase kinase 2                            | UP |
| Mest          | 17294                                | 1.33 | 0.82 | mesoderm specific transcript                                                | UP |
| Bicd2         | 76895                                | 1.32 | 0.80 | bicaudal D homolog 2 (Drosophila)                                           | UP |
| Ms4a1         | 12482                                | 1.32 | 0.82 | membrane-spanning 4-domains, subfamily A, member 1                          | UP |
| LOC101055780  | 101055780                            | 1.31 | 0.80 | envelope glycoprotein-like                                                  | UP |
| 5430417L22Rik | 100043272                            | 1.28 | 0.81 | RIKEN cDNA 5430417L22 gene                                                  | UP |
| Slc6a4        | 15567                                | 1.27 | 0.82 | solute carrier family 6 (neurotransmitter transporter, serotonin), member 4 | UP |
| Prkar2b       | 19088                                | 1.27 | 0.82 | protein kinase, cAMP dependent regulatory, type II beta                     | UP |
| Retnlg        | 245195                               | 1.27 | 0.82 | resistin like gamma                                                         | UP |
| Cd22          | 12483                                | 1.24 | 0.80 | CD22 antigen                                                                | UP |
| Lyz1          | 17110                                | 1.23 | 0.81 | lysozyme 1                                                                  | UP |
| Cd79a         | 12518                                | 1.22 | 0.81 | CD79A antigen (immunoglobulin-associated alpha)                             | UP |
| Rara          | 19401                                | 1.21 | 0.80 | retinoic acid receptor, alpha                                               | UP |
| Lyz2          | 17105                                | 1.19 | 0.81 | lysozyme 2                                                                  | UP |
| Parvb         | 170736                               | 1.19 | 0.81 | parvin, beta                                                                | UP |
| Ormdl3        | 66612                                | 1.19 | 0.81 | ORM1-like 3 (S. cerevisiae)                                                 | UP |
| -             | gi 142369301 ref<br>[NM_008148.3]    | 1.18 | 0.81 | Mus musculus glycoprotein 5 (platelet) (Gp5), mRNA                          | UP |

|          |                            |       |      |                                                                                                |      |
|----------|----------------------------|-------|------|------------------------------------------------------------------------------------------------|------|
| Cd226    | 225825                     | 1.16  | 0.80 | CD226 antigen                                                                                  | UP   |
| Gm20594  | 100463512                  | 1.11  | 0.80 | predicted gene, 20594                                                                          | UP   |
| Lgals3bp | 19039                      | -1.16 | 0.80 | lectin, galactoside-binding, soluble, 3 binding protein                                        | DOWN |
| Lgals1   | 16852                      | -1.16 | 0.80 | lectin, galactose binding, soluble 1                                                           | DOWN |
| Ngp      | 18054                      | -1.20 | 0.82 | neutrophilic granule protein                                                                   | DOWN |
| Rrbp1    | 81910                      | -1.21 | 0.80 | ribosome binding protein 1                                                                     | DOWN |
| Prdx1    | 18477                      | -1.21 | 0.80 | peroxiredoxin 1                                                                                | DOWN |
| Ctsb     | 13030                      | -1.23 | 0.82 | cathepsin B                                                                                    | DOWN |
| Psmc1    | 19179                      | -1.24 | 0.80 | protease (prosome, macropain) 26S subunit, ATPase 1                                            | DOWN |
| Clec4a1  | 269799                     | -1.25 | 0.81 | C-type lectin domain family 4, member a1                                                       | DOWN |
| Ier3     | 15937                      | -1.25 | 0.80 | immediate early response 3                                                                     | DOWN |
| Ehd1     | 13660                      | -1.25 | 0.81 | EH-domain containing 1                                                                         | DOWN |
| Stfa3    | 20863                      | -1.26 | 0.81 | stefin A3                                                                                      | DOWN |
| Npm1     | 18148                      | -1.27 | 0.80 | nucleophosmin 1                                                                                | DOWN |
| Hnrnpab  | 15384                      | -1.27 | 0.81 | heterogeneous nuclear ribonucleoprotein A/B                                                    | DOWN |
| Ncl      | 17975                      | -1.28 | 0.80 | nucleolin                                                                                      | DOWN |
| -        | gi 6753323 ref NM_009838.1 | -1.28 | 0.81 | Mus musculus chaperonin containing Tcp1, subunit 6a (zeta) (Cct6a), mRNA                       | DOWN |
| P4hb     | 18453                      | -1.29 | 0.82 | prolyl 4-hydroxylase, beta polypeptide                                                         | DOWN |
| AW112010 | 107350                     | -1.29 | 0.81 | expressed sequence AW112010                                                                    | DOWN |
| Rnh1     | 107702                     | -1.30 | 0.82 | ribonuclease/angiogenin inhibitor 1                                                            | DOWN |
| Marcks11 | 17357                      | -1.30 | 0.82 | MARCKS-like 1                                                                                  | DOWN |
| Hspa9    | 15526                      | -1.31 | 0.80 | heat shock protein 9                                                                           | DOWN |
| Grn      | 14824                      | -1.31 | 0.82 | granulin                                                                                       | DOWN |
| AA467197 | 433470                     | -1.32 | 0.82 | expressed sequence AA467197                                                                    | DOWN |
| Psmc1    | 70247                      | -1.33 | 0.80 | proteasome (prosome, macropain) 26S subunit, non-ATPase, 1                                     | DOWN |
| Bst2     | 69550                      | -1.34 | 0.82 | bone marrow stromal cell antigen 2                                                             | DOWN |
| Creld2   | 76737                      | -1.35 | 0.80 | cysteine-rich with EGF-like domains 2                                                          | DOWN |
| Pfkfb3   | 170768                     | -1.35 | 0.81 | 6-phosphofructo-2-kinase/fructose-2,6-biphosphatase 3                                          | DOWN |
| Psmc3    | 22123                      | -1.36 | 0.81 | proteasome (prosome, macropain) 26S subunit, non-ATPase, 3                                     | DOWN |
| Psmc4    | 26441                      | -1.36 | 0.82 | proteasome (prosome, macropain) subunit, alpha type 4                                          | DOWN |
| Il1r2    | 16178                      | -1.36 | 0.82 | interleukin 1 receptor, type II                                                                | DOWN |
| Nfkb1a   | 18035                      | -1.36 | 0.82 | nuclear factor of kappa light polypeptide gene enhancer in B cells inhibitor, alpha            | DOWN |
| Pycard   | 66824                      | -1.37 | 0.81 | PYD and CARD domain containing                                                                 | DOWN |
| Pa2g4    | 18813                      | -1.39 | 0.81 | proliferation-associated 2G4                                                                   | DOWN |
| Ppp1r14b | 18938                      | -1.39 | 0.80 | protein phosphatase 1, regulatory (inhibitor) subunit 14B                                      | DOWN |
| Hspa5    | 14828                      | -1.39 | 0.83 | heat shock protein 5                                                                           | DOWN |
| Eif4a1   | 13681                      | -1.39 | 0.83 | eukaryotic translation initiation factor 4A1                                                   | DOWN |
| Gzmb     | 14939                      | -1.39 | 0.82 | granzyme B                                                                                     | DOWN |
| Psmc6    | 26443                      | -1.39 | 0.82 | proteasome (prosome, macropain) subunit, alpha type 6                                          | DOWN |
| Emr1     | 13733                      | -1.41 | 0.82 | EGF-like module containing, mucin-like, hormone receptor-like sequence 1                       | DOWN |
| Slc15a3  | 65221                      | -1.41 | 0.83 | solute carrier family 15, member 3                                                             | DOWN |
| Psmc6    | 19175                      | -1.42 | 0.82 | proteasome (prosome, macropain) subunit, beta type 6                                           | DOWN |
| Bhlhe40  | 20893                      | -1.42 | 0.81 | basic helix-loop-helix family, member e40                                                      | DOWN |
| Herpud1  | 64209                      | -1.43 | 0.83 | homocysteine-inducible, endoplasmic reticulum stress-inducible, ubiquitin-like domain member 1 | DOWN |
| Tgm2     | 21817                      | -1.43 | 0.82 | transglutaminase 2, C polypeptide                                                              | DOWN |

|         |        |       |      |                                                          |      |
|---------|--------|-------|------|----------------------------------------------------------|------|
| Pgam1   | 18648  | -1.43 | 0.83 | phosphoglycerate mutase 1                                | DOWN |
| Ntng2   | 171171 | -1.43 | 0.82 | netrin G2                                                | DOWN |
| Zc3h12a | 230738 | -1.43 | 0.81 | zinc finger CCCH type containing 12A                     | DOWN |
| Ggt1    | 14594  | -1.44 | 0.82 | glycoprotein galactosyltransferase alpha 1, 3            | DOWN |
| Fam20c  | 80752  | -1.44 | 0.80 | family with sequence similarity 20, member C             | DOWN |
| Oasl1   | 231655 | -1.44 | 0.82 | 2'-5' oligoadenylate synthetase-like 1                   | DOWN |
| Rgl1    | 19731  | -1.44 | 0.81 | ral guanine nucleotide dissociation stimulator,-like 1   | DOWN |
| Cyth3   | 19159  | -1.44 | 0.80 | cytohesin 3                                              | DOWN |
| Atp2a2  | 11938  | -1.45 | 0.82 | ATPase, Ca++ transporting, cardiac muscle, slow twitch 2 | DOWN |
| Rilpl2  | 80291  | -1.45 | 0.80 | Rab interacting lysosomal protein-like 2                 | DOWN |
| Irak3   | 73914  | -1.45 | 0.83 | interleukin-1 receptor-associated kinase 3               | DOWN |
| Nop58   | 55989  | -1.45 | 0.80 | NOP58 ribonucleoprotein                                  | DOWN |
| Gadd45b | 17873  | -1.46 | 0.82 | growth arrest and DNA-damage-inducible 45 beta           | DOWN |
| Bri3    | 55950  | -1.46 | 0.82 | brain protein I3                                         | DOWN |
| C1qbp   | 12261  | -1.46 | 0.81 | complement component 1, q subcomponent binding protein   | DOWN |
| Csf1    | 12977  | -1.47 | 0.81 | colony stimulating factor 1 (macrophage)                 | DOWN |
| Ranbp1  | 19385  | -1.47 | 0.83 | RAN binding protein 1                                    | DOWN |
| Acp5    | 11433  | -1.48 | 0.83 | acid phosphatase 5, tartrate resistant                   | DOWN |
| Acp2    | 11432  | -1.48 | 0.81 | acid phosphatase 2, lysosomal                            | DOWN |
| Gde1    | 56209  | -1.48 | 0.81 | glycerophosphodiester phosphodiesterase 1                | DOWN |
| Irg1    | 16365  | -1.49 | 0.83 | immunoresponsive gene 1                                  | DOWN |
| Slc31a2 | 20530  | -1.50 | 0.82 | solute carrier family 31, member 2                       | DOWN |
| Id2     | 15902  | -1.50 | 0.84 | inhibitor of DNA binding 2                               | DOWN |
| Mcm3    | 17215  | -1.50 | 0.80 | minichromosome maintenance deficient 3 (S. cerevisiae)   | DOWN |
| Rasa4   | 54153  | -1.50 | 0.80 | RAS p21 protein activator 4                              | DOWN |
| Cpne2   | 234577 | -1.51 | 0.83 | copine II                                                | DOWN |
| Ikake   | 56489  | -1.51 | 0.83 | inhibitor of kappaB kinase epsilon                       | DOWN |
| Manf    | 74840  | -1.52 | 0.82 | mesencephalic astrocyte-derived neurotrophic factor      | DOWN |
| Gns     | 75612  | -1.52 | 0.83 | glucosamine (N-acetyl)-6-sulfatase                       | DOWN |
| Slc39a4 | 72027  | -1.52 | 0.82 | solute carrier family 39 (zinc transporter), member 4    | DOWN |
| Txnrd1  | 50493  | -1.52 | 0.82 | thioredoxin reductase 1                                  | DOWN |
| Ms4a4a  | 666907 | -1.53 | 0.83 | membrane-spanning 4-domains, subfamily A, member 4A      | DOWN |
| Mki67   | 17345  | -1.53 | 0.81 | antigen identified by monoclonal antibody Ki 67          | DOWN |
| Lrrc59  | 98238  | -1.53 | 0.82 | leucine rich repeat containing 59                        | DOWN |
| Asprv1  | 67855  | -1.56 | 0.84 | aspartic peptidase, retroviral-like 1                    | DOWN |
| Ms4a6d  | 68774  | -1.57 | 0.84 | membrane-spanning 4-domains, subfamily A, member 6D      | DOWN |
| Niacr1  | 80885  | -1.58 | 0.83 | niacin receptor 1                                        | DOWN |
| Ccr5    | 12774  | -1.58 | 0.83 | chemokine (C-C motif) receptor 5                         | DOWN |
| Pltp    | 18830  | -1.59 | 0.82 | phospholipid transfer protein                            | DOWN |
| P2rx4   | 18438  | -1.59 | 0.82 | purinergic receptor P2X, ligand-gated ion channel 4      | DOWN |
| Ccl5    | 20304  | -1.60 | 0.85 | chemokine (C-C motif) ligand 5                           | DOWN |
| Cd38    | 12494  | -1.61 | 0.84 | CD38 antigen                                             | DOWN |
| Anxa4   | 11746  | -1.62 | 0.83 | annexin A4                                               | DOWN |
| Renbp   | 19703  | -1.62 | 0.81 | renin binding protein                                    | DOWN |
| Nr1h3   | 22259  | -1.62 | 0.82 | nuclear receptor subfamily 1, group H, member 3          | DOWN |
| Chi3l3  | 12655  | -1.64 | 0.85 | chitinase 3-like 3                                       | DOWN |

|         |                                   |       |      |                                                                                |      |
|---------|-----------------------------------|-------|------|--------------------------------------------------------------------------------|------|
| P2ry2   | 18442                             | -1.64 | 0.81 | purinergic receptor P2Y, G-protein coupled 2                                   | DOWN |
| Mafb    | 16658                             | -1.65 | 0.81 | v-maf musculoaponeurotic fibrosarcoma oncogene family, protein B (avian)       | DOWN |
| Tuba1b  | 22143                             | -1.65 | 0.81 | tubulin, alpha 1B                                                              | DOWN |
| Cndp2   | 66054                             | -1.66 | 0.84 | CNDP dipeptidase 2 (metallopeptidase M20 family)                               | DOWN |
| Ets2    | 23872                             | -1.66 | 0.83 | E26 avian leukemia oncogene 2, 3' domain                                       | DOWN |
| Ppa1    | 67895                             | -1.66 | 0.81 | pyrophosphatase (inorganic) 1                                                  | DOWN |
| Sdc3    | 20970                             | -1.67 | 0.84 | syndecan 3                                                                     | DOWN |
| Vat1    | 26949                             | -1.68 | 0.81 | vesicle amine transport protein 1 homolog (T californica)                      | DOWN |
| Bnip3   | 12176                             | -1.68 | 0.81 | BCL2/adenovirus E1B interacting protein 3                                      | DOWN |
| Dnase2a | 13423                             | -1.69 | 0.81 | deoxyribonuclease II alpha                                                     | DOWN |
| Dusp5   | 240672                            | -1.70 | 0.82 | dual specificity phosphatase 5                                                 | DOWN |
| -       | gi 227499243 ref<br>[NM_010220.3] | -1.70 | 0.84 | Mus musculus FK506 binding protein 5 (Fkbp5), mRNA                             | DOWN |
| Apoc2   | 11813                             | -1.71 | 0.82 | apolipoprotein C-II                                                            | DOWN |
| Hat1    | 107435                            | -1.72 | 0.80 | histone aminotransferase 1                                                     | DOWN |
| Lacc1   | 210808                            | -1.72 | 0.83 | laccase (multicopper oxidoreductase) domain containing 1                       | DOWN |
| Timm17a | 21854                             | -1.73 | 0.81 | translocase of inner mitochondrial membrane 17a                                | DOWN |
| Slc7a8  | 50934                             | -1.73 | 0.81 | solute carrier family 7 (cationic amino acid transporter, y+ system), member 8 | DOWN |
| Cstb    | 13014                             | -1.76 | 0.85 | cystatin B                                                                     | DOWN |
| Ifi204  | 15951                             | -1.77 | 0.84 | interferon activated gene 204                                                  | DOWN |
| Ms4a8a  | 64381                             | -1.78 | 0.82 | membrane-spanning 4-domains, subfamily A, member 8A                            | DOWN |
| G0s2    | 14373                             | -1.78 | 0.84 | G0/G1 switch gene 2                                                            | DOWN |
| Tnf     | 21926                             | -1.78 | 0.84 | tumor necrosis factor                                                          | DOWN |
| -       | gi 31981636 ref<br>NM_010738.2]   | -1.80 | 0.85 | Mus musculus lymphocyte antigen 6 complex, locus A (Ly6a), mRNA                | DOWN |
| Slamf7  | 75345                             | -1.80 | 0.83 | SLAM family member 7                                                           | DOWN |
| Srm     | 20810                             | -1.81 | 0.82 | spermidine synthase                                                            | DOWN |
| Il1rn   | 16181                             | -1.81 | 0.85 | interleukin 1 receptor antagonist                                              | DOWN |
| Cfb     | 14962                             | -1.82 | 0.86 | complement factor B                                                            | DOWN |
| Fnip2   | 329679                            | -1.84 | 0.83 | folliculin interacting protein 2                                               | DOWN |
| Rapgef2 | 76089                             | -1.85 | 0.82 | Rap guanine nucleotide exchange factor (GEF) 2                                 | DOWN |
| Lgmn    | 19141                             | -1.87 | 0.86 | legumain                                                                       | DOWN |
| Mfsd7a  | 243197                            | -1.87 | 0.81 | major facilitator superfamily domain containing 7A                             | DOWN |
| Cks1b   | 54124                             | -1.88 | 0.80 | CDC28 protein kinase 1b                                                        | DOWN |
| Mx1     | 17857                             | -1.90 | 0.82 | myxovirus (influenza virus) resistance 1                                       | DOWN |
| Hmox1   | 15368                             | -1.90 | 0.86 | heme oxygenase (decycling) 1                                                   | DOWN |
| Rab20   | 19332                             | -1.90 | 0.84 | RAB20, member RAS oncogene family                                              | DOWN |
| Mrpl45  | 67036                             | -1.91 | 0.82 | mitochondrial ribosomal protein L45                                            | DOWN |
| Cd14    | 12475                             | -1.91 | 0.86 | CD14 antigen                                                                   | DOWN |
| Top2a   | 21973                             | -1.92 | 0.82 | topoisomerase (DNA) II alpha                                                   | DOWN |
| Bcl2a1b | 12045                             | -1.93 | 0.84 | B cell leukemia/lymphoma 2 related protein A1b                                 | DOWN |
| Batf    | 53314                             | -1.95 | 0.85 | basic leucine zipper transcription factor, ATF-like                            | DOWN |
| Tmem8   | 60455                             | -1.97 | 0.82 | transmembrane protein 8 (five membrane-spanning domains)                       | DOWN |
| Dtx2    | 74198                             | -1.98 | 0.84 | deltex 2 homolog (Drosophila)                                                  | DOWN |
| Cdkn1a  | 12575                             | -1.99 | 0.83 | cyclin-dependent kinase inhibitor 1A (P21)                                     | DOWN |
| F10     | 14058                             | -1.99 | 0.86 | coagulation factor X                                                           | DOWN |

|           |                              |       |      |                                                                                   |      |
|-----------|------------------------------|-------|------|-----------------------------------------------------------------------------------|------|
| Uap1l1    | 227620                       | -2.00 | 0.83 | UDP-N-acteylglucosamine pyrophosphorylase 1-like 1                                | DOWN |
| Phlda1    | 21664                        | -2.01 | 0.81 | pleckstrin homology-like domain, family A, member 1                               | DOWN |
| Snhg3     | 399101                       | -2.01 | 0.83 | small nucleolar RNA host gene (non-protein coding) 3                              | DOWN |
| Sdc4      | 20971                        | -2.02 | 0.84 | syndecan 4                                                                        | DOWN |
| Sod2      | 20656                        | -2.02 | 0.86 | superoxide dismutase 2, mitochondrial                                             | DOWN |
| Fscn1     | 14086                        | -2.02 | 0.83 | fascin homolog 1, actin bundling protein (Strongylocentrotus purpuratus)          | DOWN |
| Sh2b2     | 23921                        | -2.05 | 0.82 | SH2B adaptor protein 2                                                            | DOWN |
| Ralgds    | 19730                        | -2.06 | 0.83 | ral guanine nucleotide dissociation stimulator                                    | DOWN |
| Gla       | 11605                        | -2.08 | 0.80 | galactosidase, alpha                                                              | DOWN |
| Tmem176a  | 66058                        | -2.08 | 0.82 | transmembrane protein 176A                                                        | DOWN |
| AI607873  | 226691                       | -2.11 | 0.86 | expressed sequence AI607873                                                       | DOWN |
| H1f0      | 14958                        | -2.11 | 0.83 | H1 histone family, member 0                                                       | DOWN |
| Maf       | 17132                        | -2.11 | 0.85 | avian musculoaponeurotic fibrosarcoma (v-maf) AS42 oncogene homolog               | DOWN |
| Fcgr1     | 14129                        | -2.12 | 0.85 | Fc receptor, IgG, high affinity I                                                 | DOWN |
| Msr1      | 20288                        | -2.13 | 0.86 | macrophage scavenger receptor 1                                                   | DOWN |
| Batf2     | 74481                        | -2.14 | 0.83 | basic leucine zipper transcription factor, ATF-like 2                             | DOWN |
| Atf3      | 11910                        | -2.15 | 0.82 | activating transcription factor 3                                                 | DOWN |
| Nt5dc2    | 70021                        | -2.15 | 0.83 | 5'-nucleotidase domain containing 2                                               | DOWN |
| Cd63      | 12512                        | -2.17 | 0.85 | CD63 antigen                                                                      | DOWN |
| Htra4     | 330723                       | -2.18 | 0.81 | HtrA serine peptidase 4                                                           | DOWN |
| Tnfaip3   | 21929                        | -2.18 | 0.86 | tumor necrosis factor, alpha-induced protein 3                                    | DOWN |
| Car13     | 71934                        | -2.19 | 0.81 | carbonic anhydrase 13                                                             | DOWN |
| Insig1    | 231070                       | -2.19 | 0.84 | insulin induced gene 1                                                            | DOWN |
| -         | gi 51036620 ref NM_033524.2  | -2.20 | 0.82 | Mus musculus sprouty protein with EVH-1 domain 1, related sequence (Spred1), mRNA | DOWN |
| Jdp2      | 81703                        | -2.20 | 0.86 | Jun dimerization protein 2                                                        | DOWN |
| 5430435G2 | 226421                       | -2.22 | 0.83 | RIKEN cDNA 5430435G22 gene                                                        | DOWN |
| 2Rik      |                              |       |      |                                                                                   |      |
| Ccl9      | 20308                        | -2.23 | 0.85 | chemokine (C-C motif) ligand 9                                                    | DOWN |
| Adap2     | 216991                       | -2.23 | 0.83 | ArfGAP with dual PH domains 2                                                     | DOWN |
| Gpr31b    | 436440                       | -2.24 | 0.86 | G protein-coupled receptor 31, D17Leh66b region                                   | DOWN |
| Rgcc      | 66214                        | -2.28 | 0.82 | regulator of cell cycle                                                           | DOWN |
| Rrm2      | 20135                        | -2.29 | 0.83 | ribonucleotide reductase M2                                                       | DOWN |
| C3ar1     | 12267                        | -2.30 | 0.82 | complement component 3a receptor 1                                                | DOWN |
| Spic      | 20728                        | -2.30 | 0.84 | Spi-C transcription factor (Spi-1/PU.1 related)                                   | DOWN |
| Mertk     | 17289                        | -2.32 | 0.83 | c-mer proto-oncogene tyrosine kinase                                              | DOWN |
| Cxcl16    | 66102                        | -2.34 | 0.82 | chemokine (C-X-C motif) ligand 16                                                 | DOWN |
| F7        | 14068                        | -2.36 | 0.82 | coagulation factor VII                                                            | DOWN |
| Itga9     | 104099                       | -2.36 | 0.82 | integrin alpha 9                                                                  | DOWN |
| Plin2     | 11520                        | -2.36 | 0.87 | perilipin 2                                                                       | DOWN |
| Mreg      | 381269                       | -2.37 | 0.84 | melanoregulin                                                                     | DOWN |
| Fmn12     | 71409                        | -2.39 | 0.82 | formin-like 2                                                                     | DOWN |
| Siglec1   | 20612                        | -2.41 | 0.82 | sialic acid binding Ig-like lectin 1, sialoadhesin                                | DOWN |
| Orm1      | 18405                        | -2.45 | 0.85 | orosomuroid 1                                                                     | DOWN |
| Ccrl2     | 54199                        | -2.47 | 0.86 | chemokine (C-C motif) receptor-like 2                                             | DOWN |
| Mmp14     | 17387                        | -2.50 | 0.87 | matrix metalloproteinase 14 (membrane-inserted)                                   | DOWN |
| -         | gi 222418555 ref NM_153060.2 | -2.51 | 0.85 | Mus musculus spinster homolog 2 (Spns2), mRNA                                     | DOWN |

|               |        |       |      |                                                                                 |      |
|---------------|--------|-------|------|---------------------------------------------------------------------------------|------|
| Spp1          | 20750  | -2.51 | 0.85 | secreted phosphoprotein 1                                                       | DOWN |
| Met           | 17295  | -2.53 | 0.81 | met proto-oncogene                                                              | DOWN |
| C1qb          | 12260  | -2.55 | 0.87 | complement component 1, q subcomponent, beta polypeptide                        | DOWN |
| Prtn3         | 19152  | -2.55 | 0.84 | proteinase 3                                                                    | DOWN |
| Ctnbp2nl      | 80281  | -2.60 | 0.80 | CTTNBP2 N-terminal like                                                         | DOWN |
| Saa3          | 20210  | -2.63 | 0.88 | serum amyloid A 3                                                               | DOWN |
| Cxcl10        | 15945  | -2.73 | 0.86 | chemokine (C-X-C motif) ligand 10                                               | DOWN |
| Serpina3f     | 238393 | -2.75 | 0.86 | serine (or cysteine) peptidase inhibitor, clade A, member 3F                    | DOWN |
| Slc7a11       | 26570  | -2.76 | 0.81 | solute carrier family 7 (cationic amino acid transporter, y+ system), member 11 | DOWN |
| Krt19         | 16669  | -2.79 | 0.80 | keratin 19                                                                      | DOWN |
| C1qc          | 12262  | -2.79 | 0.87 | complement component 1, q subcomponent, C chain                                 | DOWN |
| Plk2          | 20620  | -2.79 | 0.85 | polo-like kinase 2                                                              | DOWN |
| Ctsl          | 13039  | -2.79 | 0.88 | cathepsin L                                                                     | DOWN |
| Prss8         | 76560  | -2.84 | 0.86 | protease, serine, 8 (prostasin)                                                 | DOWN |
| Il1a          | 16175  | -2.85 | 0.82 | interleukin 1 alpha                                                             | DOWN |
| Anpep         | 16790  | -2.89 | 0.85 | alanyl (membrane) aminopeptidase                                                | DOWN |
| Marco         | 17167  | -2.91 | 0.89 | macrophage receptor with collagenous structure                                  | DOWN |
| Cldn1         | 12737  | -2.91 | 0.86 | claudin 1                                                                       | DOWN |
| Ccl4          | 20303  | -2.92 | 0.88 | chemokine (C-C motif) ligand 4                                                  | DOWN |
| C1qa          | 12259  | -2.98 | 0.87 | complement component 1, q subcomponent, alpha polypeptide                       | DOWN |
| Ppl           | 19041  | -3.00 | 0.82 | periplakin                                                                      | DOWN |
| Prss32        | 69814  | -3.02 | 0.83 | protease, serine, 32                                                            | DOWN |
| Pigr          | 18703  | -3.05 | 0.81 | polymeric immunoglobulin receptor                                               | DOWN |
| 2310007B03Rik | 71874  | -3.05 | 0.86 | RIKEN cDNA 2310007B03 gene                                                      | DOWN |
| Epha2         | 13836  | -3.07 | 0.81 | Eph receptor A2                                                                 | DOWN |
| Timp1         | 21857  | -3.08 | 0.81 | tissue inhibitor of metalloproteinase 1                                         | DOWN |
| Slc5a1        | 20537  | -3.08 | 0.85 | solute carrier family 5 (sodium/glucose cotransporter), member 1                | DOWN |
| Muc20         | 224116 | -3.10 | 0.85 | mucin 20                                                                        | DOWN |
| Htra1         | 56213  | -3.10 | 0.86 | HtrA serine peptidase 1                                                         | DOWN |
| Cxcl2         | 20310  | -3.14 | 0.88 | chemokine (C-X-C motif) ligand 2                                                | DOWN |
| Nrp2          | 18187  | -3.15 | 0.85 | neuropilin 2                                                                    | DOWN |
| Dab2          | 13132  | -3.16 | 0.88 | disabled 2, mitogen-responsive phosphoprotein                                   | DOWN |
| Mrc1          | 17533  | -3.17 | 0.82 | mannose receptor, C type 1                                                      | DOWN |
| Emp1          | 13730  | -3.19 | 0.89 | epithelial membrane protein 1                                                   | DOWN |
| Ptges         | 64292  | -3.22 | 0.88 | prostaglandin E synthase                                                        | DOWN |
| Serpina3h     | 546546 | -3.23 | 0.84 | serine (or cysteine) peptidase inhibitor, clade A, member 3H                    | DOWN |
| Muc1          | 17829  | -3.23 | 0.88 | mucin 1, transmembrane                                                          | DOWN |
| Fam84a        | 105005 | -3.25 | 0.85 | family with sequence similarity 84, member A                                    | DOWN |
| Rgs1          | 50778  | -3.25 | 0.81 | regulator of G-protein signaling 1                                              | DOWN |
| Chac1         | 69065  | -3.28 | 0.86 | ChaC, cation transport regulator 1                                              | DOWN |
| Clca4         | 229927 | -3.30 | 0.88 | chloride channel calcium activated 4                                            | DOWN |
| Uaca          | 72565  | -3.30 | 0.81 | uveal autoantigen with coiled-coil domains and ankyrin repeats                  | DOWN |
| Aif1l         | 108897 | -3.31 | 0.84 | allograft inflammatory factor 1-like                                            | DOWN |
| Serpina3g     | 20715  | -3.33 | 0.90 | serine (or cysteine) peptidase inhibitor, clade A, member 3G                    | DOWN |
| Cbr2          | 12409  | -3.33 | 0.85 | carbonyl reductase 2                                                            | DOWN |
| Ccl3          | 20302  | -3.34 | 0.90 | chemokine (C-C motif) ligand 3                                                  | DOWN |
| Krt13         | 16663  | -3.35 | 0.89 | keratin 13                                                                      | DOWN |

|                |           |       |      |                                                                                                         |      |
|----------------|-----------|-------|------|---------------------------------------------------------------------------------------------------------|------|
| Tspan1         | 66805     | -3.36 | 0.86 | tetraspanin 1                                                                                           | DOWN |
| Epn3           | 71889     | -3.37 | 0.87 | epsin 3                                                                                                 | DOWN |
| Gm7897         | 666028    | -3.37 | 0.84 | predicted gene 7897                                                                                     | DOWN |
| Krt23          | 94179     | -3.42 | 0.86 | keratin 23                                                                                              | DOWN |
| Hilpda         | 69573     | -3.43 | 0.87 | hypoxia inducible lipid droplet associated                                                              | DOWN |
| Gsto1          | 14873     | -3.44 | 0.90 | glutathione S-transferase omega 1                                                                       | DOWN |
| Edn1           | 13614     | -3.45 | 0.87 | endothelin 1                                                                                            | DOWN |
| Mal            | 17153     | -3.46 | 0.89 | myelin and lymphocyte protein, T cell differentiation protein                                           | DOWN |
| Alpl           | 11647     | -3.47 | 0.89 | alkaline phosphatase, liver/bone/kidney                                                                 | DOWN |
| Mt1            | 17748     | -3.47 | 0.90 | metallothionein 1                                                                                       | DOWN |
| Slc1a1         | 20510     | -3.47 | 0.83 | solute carrier family 1 (neuronal/epithelial high affinity glutamate transporter, system Xag), member 1 | DOWN |
| Gm15056        | 100504014 | -3.48 | 0.90 | predicted gene 15056                                                                                    | DOWN |
| Slurp1         | 57277     | -3.49 | 0.85 | secreted Ly6/Plaur domain containing 1                                                                  | DOWN |
| Ear11          | 93726     | -3.51 | 0.85 | eosinophil-associated, ribonuclease A family, member 11                                                 | DOWN |
| Krt7           | 110310    | -3.54 | 0.90 | keratin 7                                                                                               | DOWN |
| Calml3         | 70405     | -3.55 | 0.90 | calmodulin-like 3                                                                                       | DOWN |
| Tmprss11g      | 320454    | -3.57 | 0.85 | transmembrane protease, serine 11g                                                                      | DOWN |
| Upk1b          | 22268     | -3.58 | 0.88 | uroplakin 1B                                                                                            | DOWN |
| Eps8l2         | 98845     | -3.59 | 0.87 | EPS8-like 2                                                                                             | DOWN |
| Prss27         | 213171    | -3.59 | 0.91 | protease, serine, 27                                                                                    | DOWN |
| Csta           | 209294    | -3.61 | 0.85 | cystatin A                                                                                              | DOWN |
| Enpp3          | 209558    | -3.61 | 0.82 | ectonucleotide pyrophosphatase/phosphodiesterase 3                                                      | DOWN |
| Scel           | 64929     | -3.62 | 0.82 | sciellin                                                                                                | DOWN |
| Nccrp1         | 233038    | -3.63 | 0.90 | non-specific cytotoxic cell receptor protein 1 homolog (zebrafish)                                      | DOWN |
| Muc4           | 140474    | -3.64 | 0.90 | mucin 4                                                                                                 | DOWN |
| Ankk1          | 244859    | -3.67 | 0.83 | ankyrin repeat and kinase domain containing 1                                                           | DOWN |
| Elf3           | 13710     | -3.68 | 0.90 | E74-like factor 3                                                                                       | DOWN |
| Mpo            | 17523     | -3.68 | 0.88 | myeloperoxidase                                                                                         | DOWN |
| Rnf39          | 386454    | -3.68 | 0.84 | ring finger protein 39                                                                                  | DOWN |
| Gm6289         | 622139    | -3.71 | 0.89 | predicted gene 6289                                                                                     | DOWN |
| Gm9573         | 672682    | -3.71 | 0.91 | predicted gene 9573                                                                                     | DOWN |
| Psca           | 72373     | -3.71 | 0.91 | prostate stem cell antigen                                                                              | DOWN |
| Ctsk           | 13038     | -3.71 | 0.89 | cathepsin K                                                                                             | DOWN |
| Gpr110         | 77596     | -3.76 | 0.87 | G protein-coupled receptor 110                                                                          | DOWN |
| Frk            | 14302     | -3.77 | 0.81 | fyn-related kinase                                                                                      | DOWN |
| Krt6a          | 16687     | -3.78 | 0.88 | keratin 6A                                                                                              | DOWN |
| 2310002J15 Rik | 67859     | -3.79 | 0.85 | RIKEN cDNA 2310002J15 gene                                                                              | DOWN |
| Ccl2           | 20296     | -3.81 | 0.91 | chemokine (C-C motif) ligand 2                                                                          | DOWN |
| Slc13a3        | 114644    | -3.82 | 0.91 | solute carrier family 13 (sodium-dependent dicarboxylate transporter), member 3                         | DOWN |
| 1600029D21 Rik | 76509     | -3.82 | 0.92 | RIKEN cDNA 1600029D21 gene                                                                              | DOWN |
| AI661453       | 224833    | -3.82 | 0.90 | expressed sequence AI661453                                                                             | DOWN |
| Krt6b          | 16688     | -3.83 | 0.89 | keratin 6B                                                                                              | DOWN |
| Il10           | 16153     | -3.84 | 0.90 | interleukin 10                                                                                          | DOWN |
| Perp           | 64058     | -3.86 | 0.85 | PERP, TP53 apoptosis effector                                                                           | DOWN |
| S100a14        | 66166     | -3.89 | 0.88 | S100 calcium binding protein A14                                                                        | DOWN |
| Lypd2          | 68311     | -3.91 | 0.91 | Ly6/Plaur domain containing 2                                                                           | DOWN |
| Slc28a3        | 114304    | -3.92 | 0.87 | solute carrier family 28 (sodium-coupled nucleoside transporter), member 3                              | DOWN |
| Gpnmb          | 93695     | -3.96 | 0.88 | glycoprotein (transmembrane) nmb                                                                        | DOWN |
| Slc6a14        | 56774     | -3.97 | 0.91 | solute carrier family 6 (neurotransmitter transporter), member 14                                       | DOWN |



|               |           |        |      |                                                                                 |      |
|---------------|-----------|--------|------|---------------------------------------------------------------------------------|------|
| Krt4          | 16682     | -4.00  | 0.87 | keratin 4                                                                       | DOWN |
| Rhpn2         | 52428     | -4.01  | 0.85 | rhophilin, Rho GTPase binding protein 2                                         | DOWN |
| Defb14        | 244332    | -4.05  | 0.83 | defensin beta 14                                                                | DOWN |
| Ptx3          | 19288     | -4.07  | 0.86 | pentraxin related gene                                                          | DOWN |
| Gsta4         | 14860     | -4.08  | 0.92 | glutathione S-transferase, alpha 4                                              | DOWN |
| Vnn1          | 22361     | -4.08  | 0.82 | vanin 1                                                                         | DOWN |
| Asb11         | 68854     | -4.09  | 0.84 | ankyrin repeat and SOCS box-containing 11                                       | DOWN |
| Prss22        | 70835     | -4.09  | 0.92 | protease, serine, 22                                                            | DOWN |
| Elane         | 50701     | -4.10  | 0.88 | elastase, neutrophil expressed                                                  | DOWN |
| Slc16a11      | 216867    | -4.12  | 0.82 | solute carrier family 16 (monocarboxylic acid transporters), member 11          | DOWN |
| Defb1         | 13214     | -4.13  | 0.85 | defensin beta 1                                                                 | DOWN |
| Cnfn          | 72383     | -4.14  | 0.90 | cornifelin                                                                      | DOWN |
| Upk3bl        | 69665     | -4.15  | 0.92 | uroplakin 3B-like                                                               | DOWN |
| Plekhs1       | 226245    | -4.22  | 0.92 | pleckstrin homology domain containing, family S member 1                        | DOWN |
| Ccl7          | 20306     | -4.34  | 0.92 | chemokine (C-C motif) ligand 7                                                  | DOWN |
| BC018473      | 193217    | -4.39  | 0.88 | cDNA sequence BC018473                                                          | DOWN |
| Arg1          | 11846     | -4.47  | 0.91 | arginase, liver                                                                 | DOWN |
| Pcolce        | 18542     | -4.60  | 0.85 | procollagen C-endopeptidase enhancer protein                                    | DOWN |
| Mt2           | 17750     | -4.67  | 0.94 | metallothionein 2                                                               | DOWN |
| Plat          | 18791     | -4.72  | 0.93 | plasminogen activator, tissue                                                   | DOWN |
| Rpl26         | 19941     | -4.77  | 0.85 | ribosomal protein L26                                                           | DOWN |
| Slc25a48      | 328258    | -4.78  | 0.87 | solute carrier family 25, member 48                                             | DOWN |
| Slc13a2       | 20500     | -4.86  | 0.80 | solute carrier family 13 (sodium-dependent dicarboxylate transporter), member 2 | DOWN |
| Clca6         | 99663     | -4.97  | 0.86 | chloride channel calcium activated 6                                            | DOWN |
| Cxcl13        | 55985     | -4.98  | 0.94 | chemokine (C-X-C motif) ligand 13                                               | DOWN |
| Aldh3a1       | 11670     | -4.98  | 0.92 | aldehyde dehydrogenase family 3, subfamily A1                                   | DOWN |
| Cidea         | 12683     | -5.39  | 0.84 | cell death-inducing DNA fragmentation factor, alpha subunit-like effector A     | DOWN |
| Aqp5          | 11830     | -5.40  | 0.94 | aquaporin 5                                                                     | DOWN |
| Cldn7         | 53624     | -5.41  | 0.83 | claudin 7                                                                       | DOWN |
| Fam46b        | 100342    | -5.51  | 0.86 | family with sequence similarity 46, member B                                    | DOWN |
| Csf3          | 12985     | -5.55  | 0.86 | colony stimulating factor 3 (granulocyte)                                       | DOWN |
| Krt12         | 268482    | -5.60  | 0.97 | keratin 12                                                                      | DOWN |
| Ccnb1         | 268697    | -5.68  | 0.81 | cyclin B1                                                                       | DOWN |
| Mal2          | 105853    | -5.89  | 0.88 | mal, T cell differentiation protein 2                                           | DOWN |
| Serpinb11     | 66957     | -6.22  | 0.88 | serine (or cysteine) peptidase inhibitor, clade B (ovalbumin), member 11        | DOWN |
| AI747448      | 99709     | -6.36  | 0.85 | expressed sequence AI747448                                                     | DOWN |
| Krt5          | 110308    | -7.42  | 0.96 | keratin 5                                                                       | DOWN |
| Snord14c      | 108637    | -8.38  | 0.81 | small nucleolar RNA, C/D box 14C                                                | DOWN |
| Snord14d      | 100302593 | -8.38  | 0.81 | small nucleolar RNA, C/D box 14D                                                | DOWN |
| Cxcl1         | 14825     | -8.61  | 0.83 | chemokine (C-X-C motif) ligand 1                                                | DOWN |
| Klk11         | 56538     | -8.88  | 0.85 | kallikrein related-peptidase 11                                                 | DOWN |
| Snord32a      | 27209     | -9.07  | 0.87 | small nucleolar RNA, C/D box 32A                                                | DOWN |
| 2610528A11Rik | 70045     | -9.35  | 0.89 | RIKEN cDNA 2610528A11 gene                                                      | DOWN |
| LOC100046297  | 100046297 | -9.72  | 0.92 | 40S ribosomal protein S26-like                                                  | DOWN |
| Snord96a      | 100216534 | -9.88  | 0.92 | small nucleolar RNA, C/D box 96A                                                | DOWN |
| Cxcl3         | 330122    | -10.25 | 0.94 | chemokine (C-X-C motif) ligand 3                                                | DOWN |
